RESEARCH ARTICLE

# Analysis of multidrug resistant group B streptococci with reduced penicillin susceptibility forming small, less hemolytic colonies

Hirotsugu Banno<sup>1</sup>, Kouji Kimura<sup>1\*</sup>, Yosuke Tanaka<sup>2</sup>, Tsuyoshi Sekizuka<sup>3</sup>, Makoto Kuroda<sup>3</sup>, Wanchun Jin<sup>1</sup>, Jun-ichi Wachino<sup>1</sup>, Keiko Yamada<sup>1</sup>, Keigo Shibayama<sup>4</sup>, Yoshichika Arakawa<sup>1</sup>

**1** Department of Bacteriology, Nagoya University Graduate School of Medicine, Showa-ku, Nagoya, Aichi, Japan, **2** Department of Microbiology Laboratory, Yokohama City Seibu Hospital, St. Marianna University School of Medicine, Asahi-ku, Yokohama, Kanagawa, Japan, **3** Pathogen Genomic Center, National Institute of Infectious Diseases, Shinjyuku-ku, Tokyo, Japan, **4** Department of Bacteriology II, National Institute of Infectious Diseases, Musashi-Murayama, Tokyo, Japan

\* [koujikim@med.nagoya-u.ac.jp](mailto:koujikim@med.nagoya-u.ac.jp)

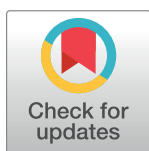

**OPEN ACCESS**

**Citation:** Banno H, Kimura K, Tanaka Y, Sekizuka T, Kuroda M, Jin W, et al. (2017) Analysis of multidrug resistant group B streptococci with reduced penicillin susceptibility forming small, less hemolytic colonies. PLoS ONE 12(8): e0183453. <https://doi.org/10.1371/journal.pone.0183453>

**Editor:** Herman Tse, The University of Hong Kong, HONG KONG

**Received:** April 11, 2017

**Accepted:** August 6, 2017

**Published:** August 17, 2017

**Copyright:** © 2017 Banno et al. This is an open access article distributed under the terms of the [Creative Commons Attribution License](https://creativecommons.org/licenses/by/4.0/), which permits unrestricted use, distribution, and reproduction in any medium, provided the original author and source are credited.

**Data Availability Statement:** All relevant data are within the paper and its Supporting Information files.

**Funding:** This work was supported by a grant (H24-Shinkou-Ippan-010) from the Ministry of Health, Labour and Welfare of Japan, and was supported in part by the Research Program on Emerging/Re-emerging Infectious Disease Project of Japan Agency for Medical Research and Development, AMED.

## Abstract

Group B streptococci (GBS; *Streptococcus agalactiae*) are the leading cause of neonatal invasive diseases and are also important pathogens for elderly adults. Until now, nearly all GBS with reduced penicillin susceptibility (PRGBS) have shown  $\beta$ -hemolytic activity and grow on sheep blood agar. However, we have previously reported three PRGBS clinical isolates harboring a *CylK* deletion that form small less hemolytic colonies. In this study, we examined the causes of small, less hemolytic colony formation in these clinical isolates. Isogenic strains were sequenced to identify the mutation related to a small colony size. We identified a 276\_277 *insG* nucleic acid insertion in the thiamin pyrophosphokinase (*tpk*) gene, resulting in premature termination at amino acid 103 in TPK, as a candidate mutation responsible for small colony formation. The recombinant strain  $\Delta$ *tpk*, which harbored the 276\_277 *insG* insertion in the *tpk* gene, showed small colony formation. The recombinant strain  $\Delta$ *cylK*, which harbored the G379T substitution in *cylK*, showed a reduction in hemolytic activity. The phenotypes of both recombinant strains were complemented by the expression of intact TPK or *CylK*, respectively. Moreover, the use of Rapid ID 32 API and VITEK MS to identify strains as GBS was evaluated clinical isolates and recombinant strains. VITEK MS, but not Rapid ID 32 API, was able to accurately identify the strains as GBS. In conclusion, we determined that mutations in *tpk* and *cylK* caused small colonies and reduced hemolytic activity, respectively, and characterized the clinical isolates in detail.

**Competing interests:** The authors have declared that no competing interests exist.

## Introduction

*Streptococcus agalactiae* (GBS) is the leading cause of neonatal sepsis and meningitis and is responsible for high mortality and morbidity, particularly in neonates and those suffering from underlying medical conditions, such as diabetes [1–3].  $\beta$ -Lactams are first-line antimicrobial agents for intrapartum antibiotic prophylaxis and the treatment of GBS infections [4, 5]. However, GBS clinical isolates with reduced penicillin susceptibility (PRGBS) have emerged via the acquisition of substitutions, including V405A and/or Q557E, in penicillin-binding protein 2X [6–10]. PRGBS clinical isolates tend to be non-susceptible or resistant to fluoroquinolones and macrolides [11–13]. Most PRGBS clinical isolates show  $\beta$ -hemolytic activity and grow on sheep blood agar. However, we previously reported three multidrug-resistant PRGBS clinical isolates (MRY11-004, MRY11-005, and NUBL-2449) that form atypical, small less- $\beta$ -hemolytic colonies on sheep blood agar [14]. These clinical isolates harbor a G379T nucleic acid substitution in the *cylK* gene, resulting in premature termination at amino acid 127 in CylK, which is required for full hemolytic activity of GBS [14].

Small colony variants (SCVs) are characterized by reduced growth, small colony size, and atypical colony morphology. Additional features, such as decreased respiration, increased resistance to aminoglycosides, reduced fermentation of sugars, and an unstable phenotype are common. SCVs are often linked to a deficiency in electron transport or thymidine biosynthesis [15], but the precise causes of small colony formation in other cases are unclear [16–20]. Although studies of the morphological and biochemical characteristics of SCVs have been most extensively studied in staphylococci [21–23], SCVs are found in various genera and species, e.g., enterococci [17, 18, 24], *Streptococcus pneumoniae* [19, 20], *Streptococcus tigurinus* [16], *Escherichia coli* [25], and *Pseudomonas aeruginosa* [15].

To our knowledge, there is one report of GBS opacity variants obtained from an unknown number of passages of a clinical isolate [26]. However, there are no previous reports of clinical GBS small colony variants. In this report, we elucidated the causes of reduced hemolytic activity and small colony formation in three clinical isolates of PRGBS.

## Materials and methods

### Bacterial strains and culture conditions

The three clinical isolates (MRY11-004, MRY11-005, and NUBL2449) were recovered from two patients in one hospital in 2011. The first patient was an 88-year-old man who had underlying diseases, including diabetic peripheral neuropathy. The isolates were recovered in January of 2011. MRY11-004 and MRY11-005 were isolated from his blood and sputum, respectively. The second patient was an 83-year-old man. NUBL-2449 was isolated from his sputum in November of 2011. All three clinical isolates were classified as ST1. Moreover, all three clinical isolates showed an identical pulsotype according to PFGE. The details of these clinical isolates are described in [14].

The GBS type V strain ATCC BAA-611 (2603 V/R) and type Ia ATCC BAA-1138 (A909) were used as the parent strains to generate recombinants. The GBS recombinant strain  $\Delta$ *cylK* was based on ATCC BAA-611, harboring the G379T substitution in *cylK*, resulting in premature termination at amino acid 127 in CylK. The GBS recombinant strain  $\Delta$ *tpk* was based on ATCC BAA-1138, harboring the 276\_277insG insertion in *tpk*, resulting in premature termination at amino acid 103 in thiamin pyrophosphokinase (TPK), which catalyzes the direct phosphorylation of thiamin via ATP to form thiamin pyrophosphate (TPP).

GBS was cultivated in Todd–Hewitt broth (THB) (BD, Franklin Lakes, NJ, USA) and Todd–Hewitt agar (THA) at 37°C in 5% CO<sub>2</sub>. GBS strains carrying recombinant pG+host6 or

pDL278 derivatives were grown in the presence of erythromycin (5 µg/ml), chloramphenicol (10 µg/ml), and/or spectinomycin (300 µg/ml). Cultivation of  $\Delta tpk$  was performed at 37°C in 5% CO<sub>2</sub> in THB and on THA containing TPP (500 µg/L). *E. coli* DH10B was grown at 37°C in LB broth and strains carrying recombinant pG+host6 or pDL278 derivatives were selected in the presence of ampicillin (200 µg/ml) and spectinomycin (200 µg/ml).

## Next-generation sequencing and analysis

Bacteria were cultured overnight at 37°C in 5% CO<sub>2</sub>, and chromosomal DNA was extracted using the QIAamp<sup>®</sup> DNA Mini Kit (Qiagen, Hilden, Germany) following the manufacturer's protocol, with slight modifications in order to completely remove RNA. The overnight culture (1 mL) was centrifuged for 10 min at 3,000 × g, and the supernatant was removed. The pellet was resuspended in 200 µL of the suspension solution and then incubated at 37°C for 90 min. Then, 20 µL of proteinase K was added, and the solution was incubated for 60 min at 57°C, until it became clear. RNase A (4 µL) was added, and the solution was incubated for 5 min at 25°C. DNA was then purified following the QIAamp DNA Kit protocol. Concentrations of extracted DNA were measured using both NanoDrop and QuBit fluorometric quantitation. Extracted DNA was then prepared for next-generation sequencing using the Nextera<sup>®</sup> XT DNA Preparation Kit. Sequencing was performed using a MiSeq sequencer (Illumina, San Diego, CA, USA) with the MiSeq Reagent Kit v3 (2 × 300 mer). Paired-end sequencing data from the MiSeq reporter software were further analyzed using CLC genomics Workbench ver. 9 (CLC Bio).

## Construction of $\Delta cylK$ and a complementation plasmid to express intact CylK in $\Delta cylK$

pG+host6- $\Delta cylK$  was constructed to introduce the G379T substitution into *cylK*. The plasmid was comprised of a thermosensitive plasmid pG+host6 backbone, with a fragment of the *cylK* gene containing the G379T substitution (nucleotide positions 659180 to 659657 in the GBS ATCC BAA-611 genome), the chloramphenicol acetyltransferase gene, conferring resistance to chloramphenicol, and a fragment of DNA from the region directly downstream of the *cylK* gene (nucleotide positions 659073 to 659648 in the GBS ATCC BAA-611 genome). These fragments were amplified by PCR using primers listed in [S1 Table](#). Then, pG+host6- $\Delta cylK$  was transformed into *E. coli* DH10B for amplification. The purified plasmid was transformed into GBS BAA-611 and the transformants were selected on THA containing 0.5 µg/ml erythromycin at 30°C. Successful integrant strains were then cultivated for 3 days in THB at 30°C without erythromycin selection to facilitate the excision of the vector pG+host6- $\Delta cylK$  [27].

The pCylK plasmid was constructed to express full-length CylK in  $\Delta cylK$ . pCylK was comprised of the *E. coli*-GBS shuttle vector plasmid pDL278 backbone, with a fragment of the promoter region from the *bca* gene (nucleotide positions 459015 to 459255 in the GBS ATCC BAA-1138 genome) and the full-length *cylK* gene (nucleotide positions 459015 to 459255 in the GBS ATCC BAA-611 genome) [28, 29]. The pCylK plasmid was transformed into *E. coli* DH10B for amplification. The purified plasmid was transformed into  $\Delta cylK$  and the transformants were selected on THA containing 300 µg/ml spectinomycin.

## Construction of $\Delta tpk$ and a complementation plasmid to express intact TPK in $\Delta tpk$

$\Delta tpk$  was constructed using a similar method to that used for the construction of  $\Delta cylK$ , with minor modifications. pG+host6- $\Delta tpk$  was constructed in order to introduce the 276\_277insG

insertion in *tpk*. The plasmid was comprised of a thermosensitive plasmid pG+host6 backbone, with a fragment of the *tpk* gene containing the 276\_277insG insertion (nucleotide positions 1790161 to 1790826 in the GBS ATCC BAA-1138 genome), the chloramphenicol acetyltransferase gene, and a fragment of DNA from the region directly downstream of the *tpk* gene (nucleotide positions 1789494 to 1790190 in the GBS ATCC BAA-1138 genome). Integrand strains were successively cultivated for 3 days in THB containing TPP (500 µg/L) at 30°C without erythromycin selection to facilitate the excision of vector pG+host6- $\Delta$ *tpk*.

The pTPK plasmid was constructed to express full-length TPK in  $\Delta$ *tpk*. pTPK was comprised of the *E. coli*-GBS shuttle vector plasmid pDL278 backbone, with a fragment of the promoter region from the *bca* gene (nucleotide positions 459015 to 459255 in the GBS ATCC BAA-1138 genome), and the full-length *tpk* gene (nucleotide positions 1790174 to 1790806 in the GBS ATCC BAA-1138 genome). pTPK was transformed into *E. coli* DH10B for amplification. The purified plasmid was transformed into  $\Delta$ *tpk* and MRY11-004. Thereafter, transformants were selected on THA containing 300 µg/ml spectinomycin at 37°C.

## Growth curve

Bacterial growth in THB at 37°C in ambient air was monitored using an OD monitor (ODBox-C; TAITEC, Koshigaya, Japan). Overnight culture (60 µL) was diluted in 6 mL of fresh THB. The cultures were shaken at 160 rpm and the optical density (600 nm) was measured every 5 min for 24 h. The experiment was performed five times.

## Transmission electron microscopy

For transmission electron microscopy (TEM) analyses, BAA-1138 and  $\Delta$ *tpk* cultures were incubated for 12 h in THB and THB containing TPP (500 µg/L), respectively. MYR11-004 and  $\Delta$ *tpk* cultures were also incubated for 12 h in THB containing no TPP. After washing with PBS (0.1 M Phosphate Buffer Solution, pH 7.4) three times, bacterial cells were washed in PBS containing 2% glutaraldehyde and then stored at 4°C overnight. Bacterial cell pellets were washed with PBS four times, resuspended in PBS containing 2% osmium tetroxide, and incubated at 4°C for 2 h. Samples were cut using an ultramicrotome. TEM was performed using the JEM-1400PLUS (JEOL, Tokyo, Japan).

## Rapid ID 32 API and VITEK MS assay

Clinical isolates,  $\Delta$ *tpk*, and BAA-1138 were analyzed using Rapid ID 32 API (bioMérieux, Marcy-l'Étoile, France) and VITEK MS (Sysmex bioMérieux) according to the manufacturer's instructions. The three clinical isolates and  $\Delta$ *tpk* were cultured on sheep blood agar (Nissui, Tokyo, Japan) for 3 days and on chocolate II agar (BD) in 5% CO<sub>2</sub> overnight. BAA-1138 cultured on sheep blood agar and on chocolate II agar in 5% CO<sub>2</sub> overnight was also analyzed.

## Nucleotide sequence accession numbers

Raw sequence data from Miseq sequencing are deposited as fastq files at EMBL/GenBank under the accession numbers SAMD00077745, SAMD00077746, SAMD00077747, SAMD00077757, SAMD00077758 and SAMD00077759 for MRY11-004, MRY11-005, NUBL-2449, MRY11-004L, MRY11-005L and NUBL-2449L, respectively. The raw sequencing data have been deposited in the DDBJ Sequence Read Archive (DRA) under accession numbers DRA005682, DRA005683, DRA005684, DRA005686, DRA005687, and DRA005688 for MRY11-004, MRY11-005, NUBL-2449, MRY11-004L, MRY11-005L, and NUBL-2449L, respectively [30].

## Statistical analysis

Growth curve data are expressed as means  $\pm$  standard deviation. The statistical significance ( $P$ -values) of differences in mean values for two-sample comparisons was determined using the Student's  $t$ -test implemented in Microsoft Excel.  $P < 0.05$  indicated statistical significance [31].

## Results

### Phenotypes of the $\Delta cyiK$ strain

To determine if  $\Delta cyiK$  causes reduced hemolytic activity and/or small colony formation, we constructed  $\Delta cyiK$  based on BAA-611 harboring the G379T substitution in  $cyiK$  gene. The recombinant strain showed less  $\beta$ -hemolytic activity than that of the wild-type strain on sheep blood agar plates. However,  $\Delta cyiK$  did not show small colony formation (Fig 1). The mutant

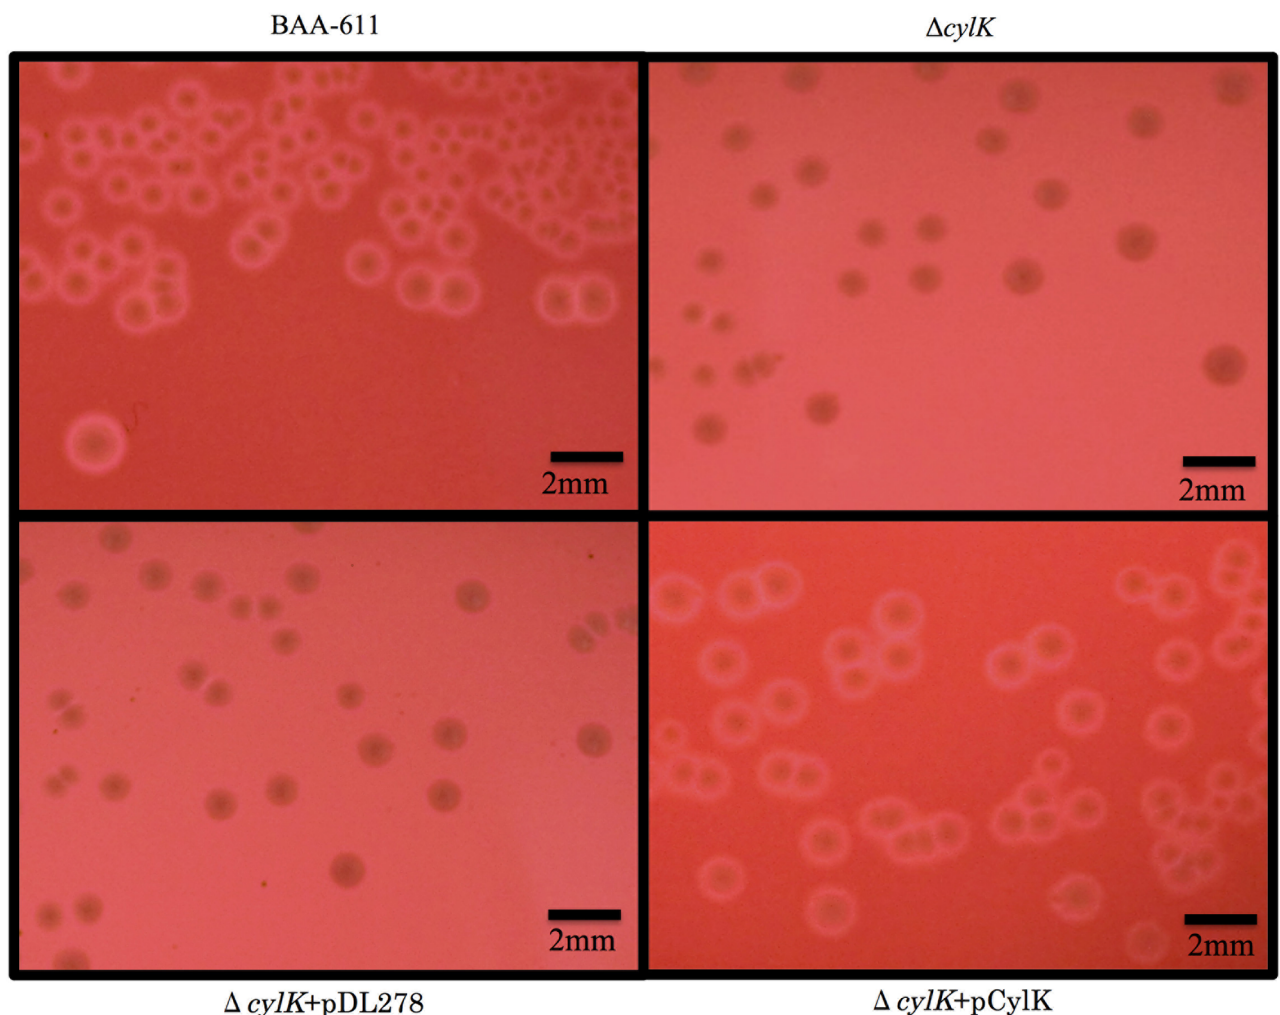

**Fig 1. Comparison of hemolytic activity and colony formation to elucidate influence of deletion  $CyiK$ .** Colony size and hemolytic activity of a GBS ATCC strain (BAA-611), recombinant strains ( $\Delta cyiK$ ), and complemented strains ( $\Delta cyiK$ + pDL278 and  $\Delta cyiK$ +pCyiK) on 5% sheep blood agar. The strains were grown at 37°C in 5% CO<sub>2</sub> for 16 h.  $\Delta cyiK$  is a recombinant strain based on ATCC BAA-611, harboring the G379T substitution in  $cyiK$ , resulting in premature termination at amino acid 127 in  $CyiK$ . pDL278 is a gram-positive and gram-negative shuttle vector. pCyiK is a complementation plasmid used to express intact TPK in the  $\Delta cyiK$  strain.

<https://doi.org/10.1371/journal.pone.0183453.g001>

was then complemented with a plasmid harboring *cylK* and the resulting strain showed similar hemolytic activity to that of the wild type on sheep blood agar plates (S1 Fig).

### Identification of the cause of small colony formation and phenotypes of the $\Delta tpk$ strain

After several *in vitro* passages on 5% sheep blood agar, three clinical isolates reverted to a fast-growing phenotype and large colony size, equal to that of the GBS ATCC strains (approximately 1 mm in diameter). Large colonies were confirmed to be GBS using the agglutination method with anti-Lancefield B antigen serum and serotype VIII with anti-GBS serotype-specific serum, and these results were identical to those obtained for clinical isolates. To identify a causal genetic factor for the observed differences, the whole genomes of the clinical isolates and the derivative strains were sequenced. Genomes were compared using CLC Workbench ver. 9 to detect single nucleotide polymorphisms (SNPs). Although several SNPs were found in comparisons between the clinical isolates and derivative strains (Table 1), only the 276\_277insG insertion in the *tpk* gene was found in all three clinical isolates. This insertion was confirmed using Sanger sequencing, and caused premature termination at amino acid 103 in TPK. To determine the effects of this insertion, we constructed the  $\Delta tpk$  recombinant strain based on *S. agalactiae* ATCC BAA-1138 harboring the 276\_277insG insertion in the *tpk* gene. The  $\Delta tpk$  strain showed similar hemolytic activity on sheep blood agar to that of the wild-type strain (S1 Fig) and smaller colonies (less than 1 mm in diameter) than those of the wild-type strain (approximately 1 mm in diameter) on sheep blood agar (Fig 2). Moreover, when a plasmid expressing full-length TPK was introduced into  $\Delta tpk$  and MRY11-004, the resulting strain showed similar colony formation to that of the wild-type strain on sheep blood agar (Fig 2).

**Table 1. Nucleic acid differences between MRY11-004 and MRY11-004L, MRY11-005 and MRY11-005L, NUBL-2449 and NUBL-2449L using CLC workbench ver. 9 (>80%; Frequency).**

| Nucleic acid difference |            | Position                                                    | Effect (length with the insertion or deletion/full length of the gene) | Gene description (Locus tag)                                                            |
|-------------------------|------------|-------------------------------------------------------------|------------------------------------------------------------------------|-----------------------------------------------------------------------------------------|
| MRY11-004               | MRY11-004L |                                                             |                                                                        |                                                                                         |
| G                       | -          | 276_277                                                     | Frameshift (102/210)                                                   | thiamine pyrophosphokinase (SAG1775)                                                    |
| A                       | G          | 78 bases upstream of SAG2072 (78 bases upstream of SAG2073) | -                                                                      | uridine phosphorylase (SAG2072) (GntR family transcriptional regulator (SAG2073))       |
| -                       | C          | 226_227                                                     | Frameshift (80/515)                                                    | Phosphoribosyl aminoimidazolecarboxamide formyltransferase/IMP cyclohydrolase (SAG0030) |
| -                       | C          | 341_342                                                     | Frameshift (115/1275)                                                  | Mannosyl-glycoprotein endo- $\beta$ -N-acetylglucosaminidase (EN73_03515)               |
| MRY11-005               | MRY11-005L |                                                             |                                                                        |                                                                                         |
| G                       | -          | 276_277                                                     | Frameshift (102/210)                                                   | thiamine pyrophosphokinase (SAG1775)                                                    |
| NUBL2449                | NUBL2449L  |                                                             |                                                                        |                                                                                         |
| G                       | G          | 276_277                                                     | Frameshift (102/210)                                                   | thiamine pyrophosphokinase (SAG1775)                                                    |
| C                       | -          | 279                                                         |                                                                        | thiamine pyrophosphokinase (SAG1775)                                                    |
| -                       | C          | 1442_1443                                                   | Frameshift (501/692)                                                   | elongation factor G (SAG1769)                                                           |

The strains MRY11-004L, MRY11-005L, and NUBL2449L are large colony strains derived from their parental clinical small colony strains MRY11-004, MRY11-005, and NUBL2449, respectively, after several passages on sheep blood agar. - indicates a deletion. Position is defined as the distance from the start codon. Frequency = Count (detected specific nucleic acids at a nucleic acid position)/Coverage (all nucleic acids at a certain nucleic acid position).

<https://doi.org/10.1371/journal.pone.0183453.t001>

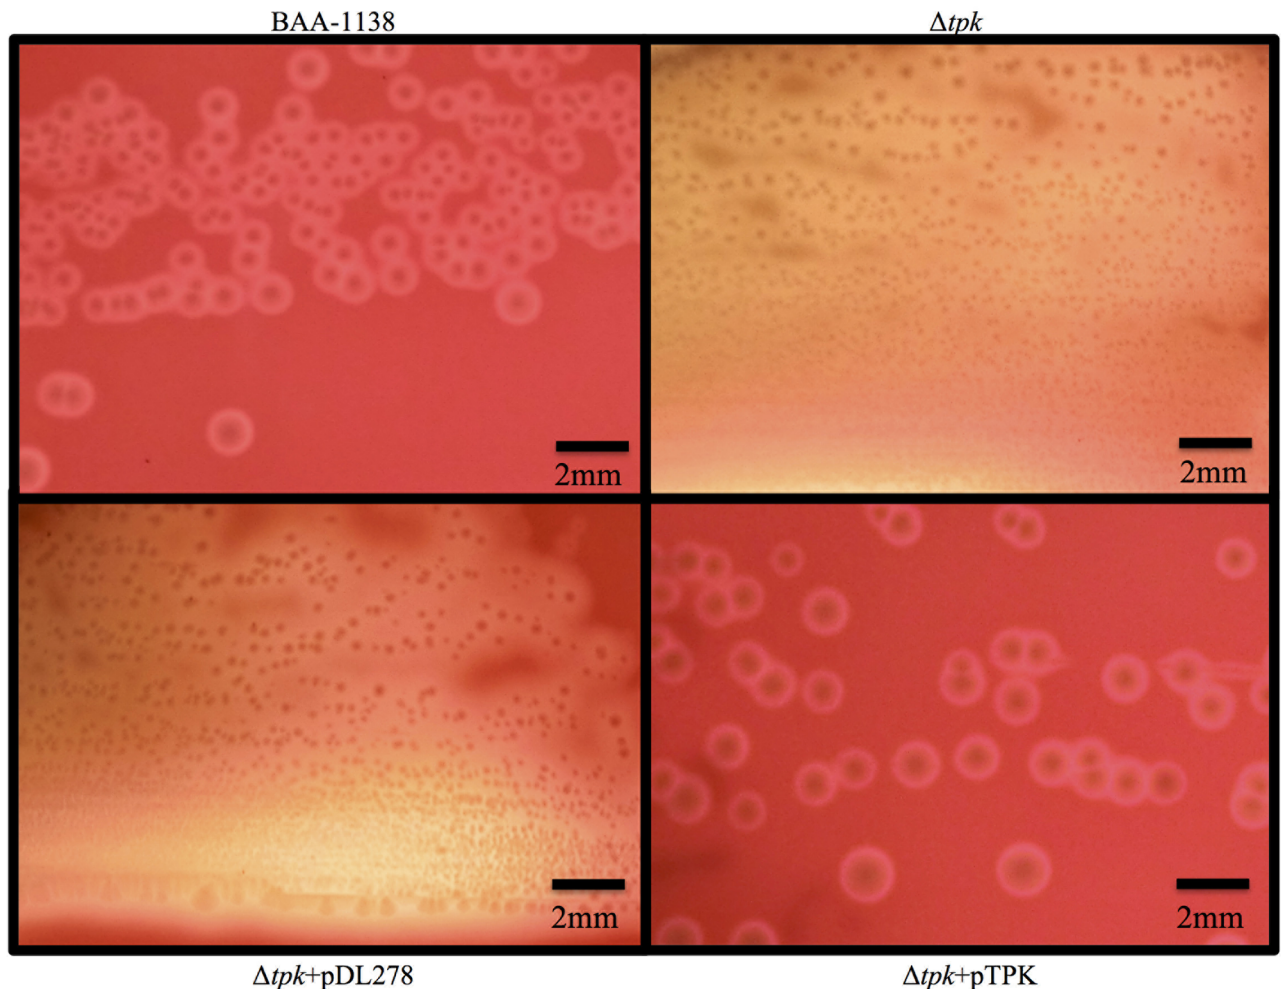

**Fig 2. Comparison of hemolytic activity and colony formation to elucidate influence of deletion TPK.** Colony morphology of BAA-1138,  $\Delta tpk$ ,  $\Delta tpk+pDL278$ , and  $\Delta tpk+pTPK$  grown on sheep blood agar. BAA-1138 and  $\Delta tpk+pTPK$  were grown at 37°C in 5% CO<sub>2</sub> for 16 h.  $\Delta tpk$  and  $\Delta tpk+pDL278$  were grown at 37°C in 5% CO<sub>2</sub> for 72 h.  $\Delta tpk$  is a recombinant strain based on ATCC BAA-1138, harboring the 276\_277insG insertion in *tpk*, resulting in a deletion in premature termination at amino acid 103 in thiamin pyrophosphokinase (TPK). pDL278 is a gram-positive and gram-negative shuttle vector. pTPK is a complementation plasmid used to express intact TPK in the  $\Delta tpk$  strain.

<https://doi.org/10.1371/journal.pone.0183453.g002>

### Comparative analysis of growth characteristics

We monitored the growth of the clinical isolates GBS ATCC strain BAA-1138,  $\Delta tpk$ ,  $\Delta tpk+pDL278$ , and  $\Delta tpk+pTPK$ . The GBS ATCC BAA-1138,  $\Delta tpk+pTPK$ , and  $\Delta tpk$  supplemented with TPP (500 µg/L) had similar growth profiles. However, the clinical isolates  $\Delta tpk$  and  $\Delta tpk+pDL278$  displayed significantly reduced growth compared with that of the GBS ATCC strain BAA-1138,  $\Delta tpk$  supplemented with TPP (500 µg/L), and  $\Delta tpk+pTPK$  (Fig 3).

### Auxotrophic testing

The clinical isolates and  $\Delta tpk$  showed similar colony sizes to those of GBS ATCC strains on sheep blood agar, MHA, and THA containing greater than 50 µg/L TPP. Additionally, similar to A909, these isolates grew on sheep blood agar around discs containing 20 µg of TPP. However, on MHA with 5% sheep blood and sheep blood agar around discs with 20 µg of

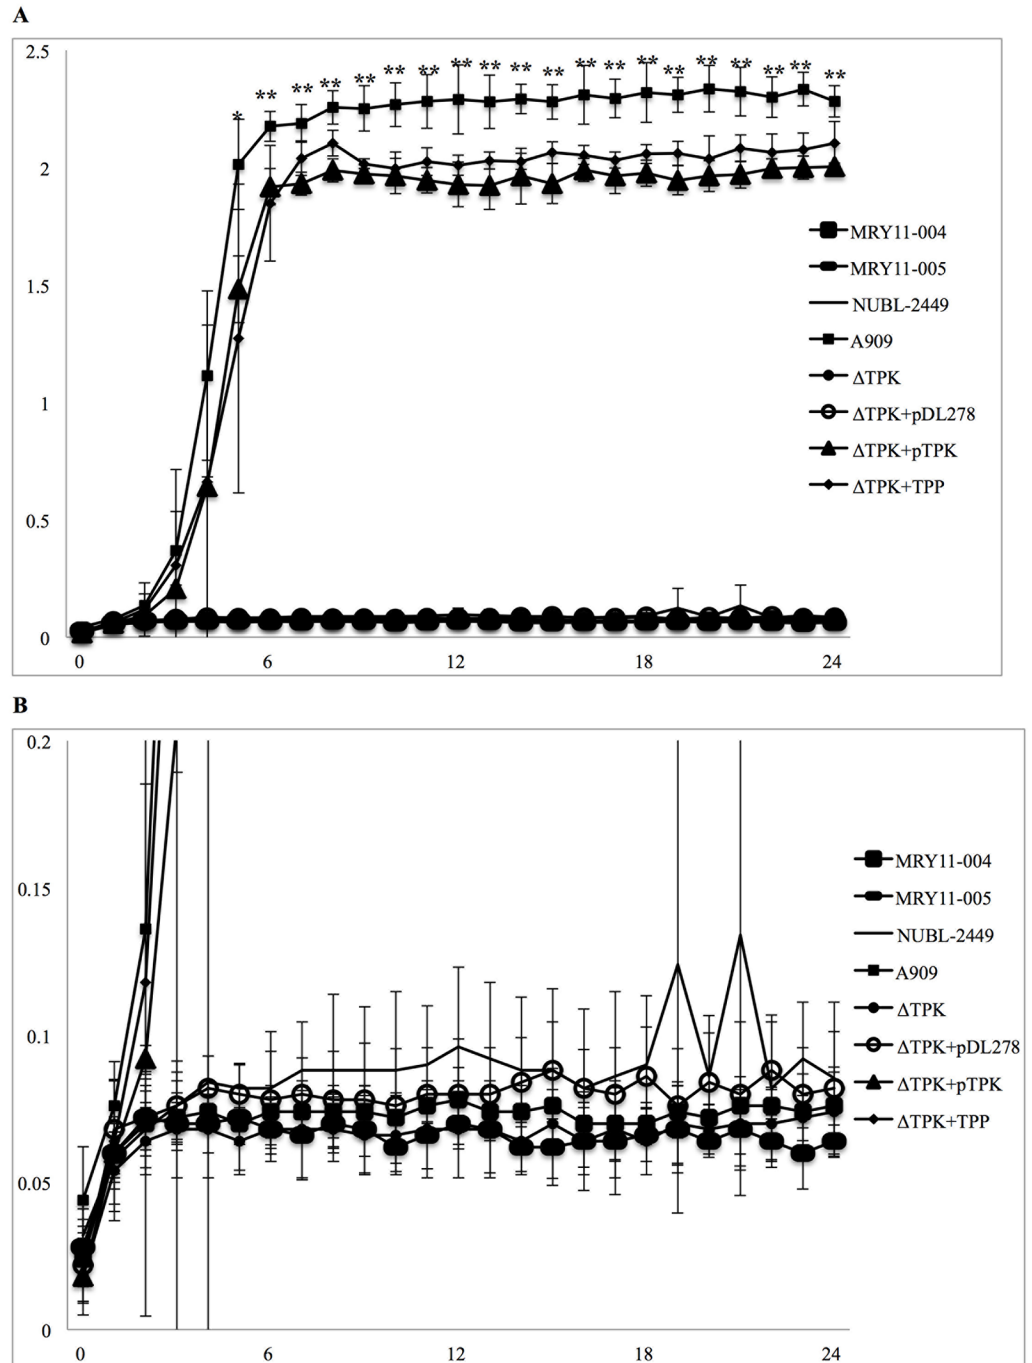

**Fig 3. Comparison of growth rate of GBS ATCC strain, recombinant strain and complemented strains.** Growth curves ( $OD_{600nm}$ ) of the clinical isolates (MRY11-004, MRYP11-005, and NUBL-2449), GBS ATCC strain (BAA-1138), recombinant strain ( $\Delta tpk$ ), and complemented strains ( $\Delta tpk+pDL278$  and  $\Delta tpk+pTPK$ ) at 37°C in ambient air (A,B).  $OD_{600nm} = 0-2.5$  (A),  $OD_{600nm} = 0-0.2$  (B). Data are presented as averages of five independent experiments. Data are the mean  $\pm$  standard deviation  $OD_{600nm}$ . \*, \*\* Statistically significant difference: \* $P < 0.05$ ; \*\* $P < 0.01$ .  $\Delta tpk$  indicates a recombinant strain based on ATCC BAA-1138, harboring the 276\_277insG insertion in *tpk*, resulting in premature termination at amino acid 103 in thiamin pyrophosphokinase (TPK). pDL278 is a gram-positive and gram-negative shuttle vector. pTPK is a complementation plasmid used to express intact TPK in the  $\Delta tpk$  strain.  $\Delta tpk+TPP$  indicates  $\Delta tpk$  grown in Todd-Hewitt broth containing thiamine pyrophosphate (500  $\mu g/L$ ).

<https://doi.org/10.1371/journal.pone.0183453.g003>



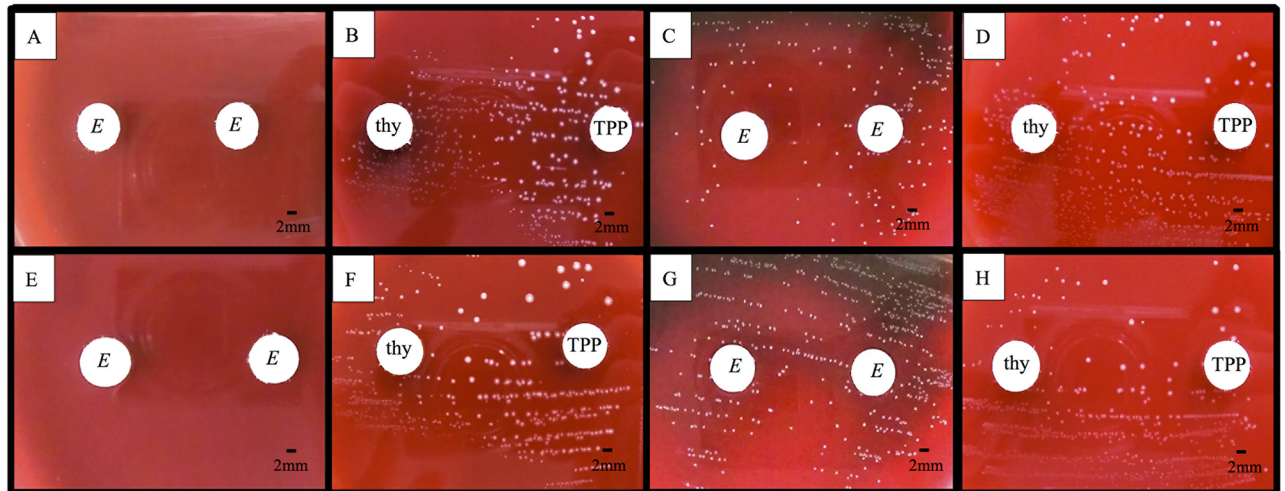

**Fig 4. Comparison of auxotrophy of GBS ATCC strain, recombinant strain  $\Delta tpk$  and complemented strains.** Colony morphology of the clinical isolate MRY11-004 (A–D) and recombinant strain  $\Delta tpk$  (E–H) grown on sheep blood agar plate (A, B, E, F) and Mueller Hinton Agar with 5% sheep blood (C, D, G, H) after incubation in 5%  $CO_2$  overnight. In B, D, F, and H, the left disc contained 20  $\mu g$  of thymidine (thy) and the right disc contained 20  $\mu g$  of thiamin pyrophosphate (TPP). In A, C, E, and G, both the left and right discs were empty (E).  $\Delta tpk$  is a recombinant strain based on ATCC BAA-1138, harboring the 276\_277insG insertion in the thiamin pyrophosphokinase (*tpk*) gene, resulting in premature termination at amino acid 103 in TPK.

<https://doi.org/10.1371/journal.pone.0183453.g004>

thymidine,  $\Delta tpk$  showed medium colony sizes (1 mm in diameter), which were smaller than those of GBS ATCC strains (Fig 4). Moreover, THA containing more than 50  $\mu g/ml$  thymidine showed medium-sized colonies. Although previous reports have shown that the addition of  $NAD^+$ , menadione, thiamine, or hemin results in a normal colony morphology in *S. aureus* SCVs, the clinical isolates and  $\Delta tpk$  did not show visible growth around discs containing 20  $\mu g$  of these compounds [15] [21] [22].

While the clinical isolates and  $\Delta tpk$  were able to grow on chocolate II agar, they showed medium colony sizes on BY chocolate agar. A comparison of the ingredients in these agars revealed that chocolate II agar contained 10 mg/L hemoglobin, while BY chocolate agar contained 5% horse blood. Accordingly, the hemoglobin content may explain the growth of the clinical isolates and  $\Delta tpk$ . Supplementation of MHA and THA with 10 mg/mL hemoglobin confirmed this hypothesis; the clinical isolates and  $\Delta tpk$  showed colony sizes similar to those of the ATCC strain.

## TEM analyses

BAA-1138 and  $\Delta tpk$  containing TPP (500  $\mu g/L$ ) exhibited regular cell division with single cross walls in dividing cells. However, cell division in MRY11-004 and  $\Delta tpk$  appeared to terminate before the cells could fully separate and show agglutination. Moreover, only MRY11-004 showed heterogeneous cell sizes and cell clusters (Fig 5).

## Identification by Rapid ID 32 Strep API and VITEK MS

Although the clinical isolates and BAA-1138 were identified as GBS using the Rapid ID 32 Strep API system,  $\Delta tpk$  cultured on sheep blood was not identified as GBS and was judged as SDSE or GBS. Concerning biological profiles, the clinical isolates showed different trehalose (TRE), pullulan (PUL), sodium pyruvate (VP), and maltose (MAL) phenotypes compared to those of BAA-1138. Moreover, in addition to PUL, VP, and MAL,  $\Delta tpk$  showed different

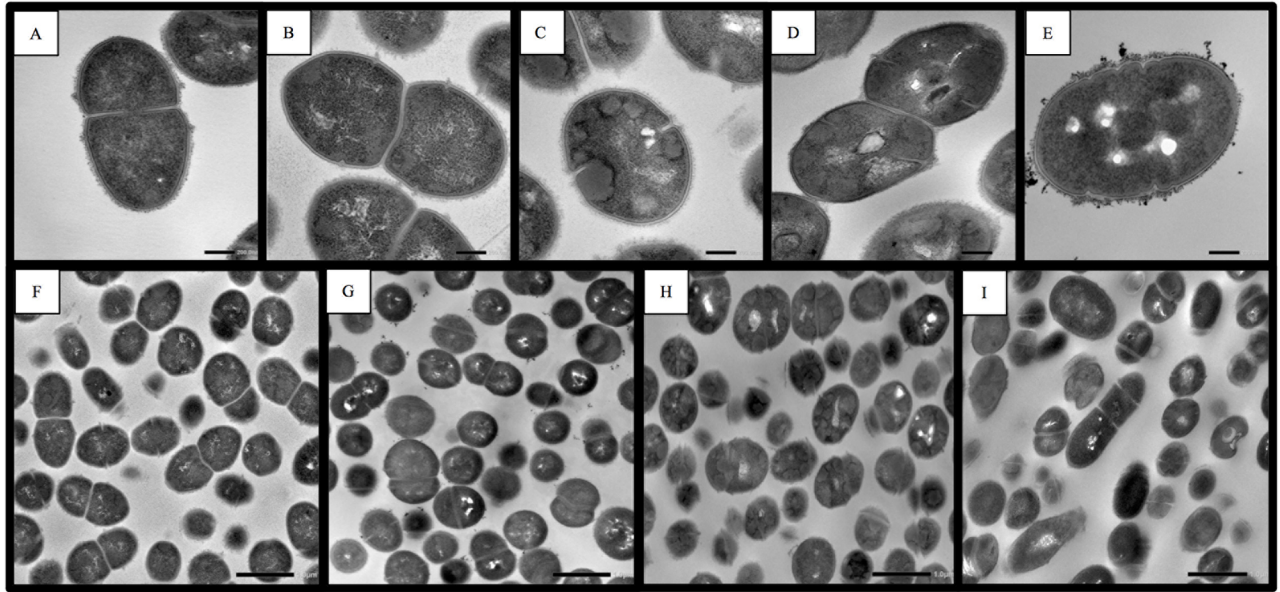

**Fig 5. Comparison of TEM analysis of GBS ATCC strain, recombinant strain and complemented strains.** TEM of BAA-1138 (A and F),  $\Delta tpk$  with TPP 500  $\mu\text{g/L}$  (B and G),  $\Delta tpk$  (C and H), and MRY11-004 (D, E and I). Bars: 200 nm (A–E). Bars: 1  $\mu\text{m}$  (F–I)  $\Delta tpk$  is a recombinant strain based on ATCC BAA-1138, harboring the 276\_277insG insertion in *tpk*, resulting in premature termination at amino acid 103 in thiamin pyrophosphokinase.

<https://doi.org/10.1371/journal.pone.0183453.g005>

sucrose (SAC) phenotypes. Therefore,  $\Delta tpk$  was unable to be correctly confirmed as GBS. However, the clinical isolates,  $\Delta tpk$ , and BAA-1138 cultured on sheep blood and chocolate II agar were identified as GBS (99.9% identity) using VITEK MS.

## Discussion

We characterized the first clinical PRGBS with less hemolytic activity and auxotrophy for TPP. The G379T substitution in *cylK* gene and 276\_277insG insertion in *tpk* gene caused the less hemolytic activity and small colony formation, respectively. In previous reports, SCVs with electron transport and thymidine biosynthesis defects have shown both small colony formation and low hemolytic activity due to the deletion of a single gene. However, in this study, small colony formation and reduced hemolytic activity were caused by different genes. The deletion of CylK results in reduced hemolytic activity on horse blood agar and similar growth to that of the parental strain in THB supplemented with 5% yeast extract [32, 33]. This suggests that full-length CylK is required for full hemolytic activity of GBS, and may not be related to cell growth and colony size. The G379T substitution in *cylK*, resulting in premature termination at amino acid 127 in CylK, was associated with low hemolytic activity. The deletion of amino acids 22 to 115 of CylK have been reported to cause reduced hemolytic activity [32]. Therefore, full-length CylK might be required for full hemolytic activity in GBS. In the TEM analysis, a clinical isolate showed heterogeneous cell sizes and cell clusters; however, there are many candidate loci associated with this heterogeneity based on next-generation sequence data for the three clinical isolates and therefore the underlying causes are unknown.

The  $\Delta tpk$  strain, which exhibited premature termination at amino acid 103 in TPK, showed small colony formation. Moreover, complementation of the strain with a plasmid harboring full-length TPK resulted in similar colony sizes to those of GBS ATCC strains. Therefore, the function of this domain is related to growth. The structure of TPK in yeast bound with TPP

has revealed the locations of the thiamin-binding site and probable catalytic residue [34]. Analysis of GBS TPK using Pfam showed that these sites were conserved. Therefore, because amino acid positions 103–210 in TPK correspond to the thiamine-binding domain,  $\Delta tpk$  and clinical isolates lacking these amino acids might not bind thiamine and accordingly might be unable to catalyze the production of TPP. Moreover, because TPP, a coenzyme form of vitamin B1, is important for the formation of a coenzyme required for central metabolic functions (pyruvate decarboxylase, pyruvate dehydrogenase,  $\alpha$ -ketoglutarate dehydrogenase, and transketolase), TPP might be essential for cell growth in bacteria and  $\Delta tpk$  might exhibit growth defects [35]. Moreover, in *Schizosaccharomyces pombe*, *tnr3*-recombinant strains (low-expressed TPK) grow slowly and show aberrant morphology [36]. The TPK deletion has not been detected in bacterial clinical isolates; therefore, these are the first known clinical isolates with the 276\_277insG insertion in the *tpk* gene.

The three clinical isolates analyzed in this study somewhat resemble previously reported SCVs. However, they also have different characteristics from previously reported SCVs. The three clinical isolates showed slow growth phenotypes on THA, sheep blood agar, and in THB. This phenotype resembles that of previously reported SCVs [15–18, 24]. However, the clinical isolates in this study did not show irregular cell shapes, as observed in other SCVs, when analyzed by TEM [17, 18], nor did they show auxotrophy for menadione, hemine, or thiamine, as did SCVs of *S. aureus*. The clinical isolates and  $\Delta tpk$  showed auxotrophy for TPP. Moreover, small colony formation was caused by a partial deletion in the TPK, which has not been reported in other SCVs to date. In general, electron transport deficient-SCVs and thymidine biosynthesis deficient-SCVs show an increase in gentamicin and sulfamethoxazole/trimethoprim MIC, respectively. Although the three clinical isolates showed resistance to sulfamethoxazole/trimethoprim (MIC, >256  $\mu\text{g}/\text{ml}$ ), there was no difference observed in the MIC of gentamicin for the clinical isolate MRY11-004 (MIC 32  $\mu\text{g}/\text{ml}$ ) compared to those of MRY11-004+pTPK (MIC 32  $\mu\text{g}/\text{ml}$ , expressing full-length TPK in MRY11-004),  $\Delta tpk$  (MIC 64  $\mu\text{g}/\text{ml}$ ), and  $\Delta tpk$  +pTPK (MIC 64  $\mu\text{g}/\text{ml}$ ). Furthermore, SCVs are typically isolated from patients undergoing long-term antibiotic therapy, and can cause latent or recurrent infections [15]. For the three clinical isolates, sulbactam/ampicillin therapy was documented from October 25 to October 31 and from November 28 to December 2 in 2010. Thereafter, two of the clinical isolates (MRY11-004 and MRY11-005) were isolated from sputum and blood on January 4, 2011. Moreover, piperacillin/tazobactam and levofloxacin therapy was documented from October 22 to October 25 and from November 27 to November 31 in 2010, respectively. The clinical isolate NUBL-2449 was isolated from sputum on November 14, 2012 [14]. Therefore, no cases of long-term antibiotic therapy were documented in the two patients, and this likely does not explain the small colony formation phenotype. On the other hand, these  $\beta$ -lactam and quinolone therapies might have selected for multidrug resistance and/or PRGBS. Selection for PRGBS by long-term  $\beta$ -lactam therapy has been observed [9]. Additionally, conventional identification systems (e.g., the API Rapid system) have failed to identify *E. coli*, *E. faecium*, and *E. faecalis* SCVs correctly [18, 24, 25]. Although the clinical isolates cultured on chocolate II agar and sheep blood agar could be detected using the Rapid ID 32 Strep API system,  $\Delta tpk$  on sheep blood agar yielded no definitive results owing to an inconsistent biological phenotype. Furthermore, several biochemical phenotypes were different from those of the parental strain and GBS ATCC strains. Therefore, clinical isolates of GBS with deletions in the *tpk* gene might be misidentified in the future. In contrast to conventional identification systems based on biochemical characteristics, the clinical isolates and  $\Delta tpk$  were correctly identified by VITEK MS (99.9% identity). Moreover, *E. faecium* SCVs were precisely identified by VITEK MS [18]. These findings suggest that MALDI-TOF MS is a powerful tool for the identification of strains with similar atypical phenotypes.

In conclusion, we characterized the first PRGBS clinical isolates with reduced hemolytic activity and auxotrophy for TPP. Moreover, we found that VITEK MS correctly identified GBS with a deletion in TPK. In this study, we revealed the causes of small colony formation with less hemolytic activity and characterized clinical isolates in detail. Because these clinical isolates may be misclassified using routine bacterial tests and are multidrug resistant, they represent a potential public health concern.

## Supporting information

**S1 Fig. Comparison of hemolytic activity of clinical isolates, recombinant strains and complemented strains.** Clinical isolates (MRY11-004, MRY11-005 and NUBL-2449), recombinant strains ( $\Delta cylK$  and  $\Delta tpk$ ) and complemented strains ( $\Delta cylK$ +pDL278,  $\Delta cylK$ +pCylK,  $\Delta tpk$ +pTPK and  $\Delta tpk$ +pTPK) on Mueller Hinton Agar with 5% Sheep Blood.  $\Delta cylK$  indicates a recombinant strain based on ATCC BAA-611, harbouring the G379T substitution in *cylK*, resulting in premature termination at amino acid 127 in CylK. pDL278 is a Gram-positive and gram-negative shuttle vector.  $\Delta cylK$ +pCylK indicates a complementation plasmid to express intact TPK in  $\Delta cylK$  strain.  $\Delta tpk$  indicates a recombinant strain based on ATCC BAA-1138, harbouring the 276\_277insG insertion in *tpk*, resulting in premature termination at amino acid 103 in thiamin pyrophosphokinase.  $\Delta tpk$ +pTPK indicates a complementation plasmid to express intact TPK in  $\Delta tpk$  strain. A: MRY11-004 B: MRY11-005 C: NUBL-2449 D: 2603 V/R E;  $\Delta cylK$  F:  $\Delta cylK$  +pDL278 G:  $\Delta cylK$ +CylK H:  $\Delta cylK$ +pCylK I: A909 J;  $\Delta tpk$  K:  $\Delta tpk$ +pDL278 L;  $\Delta tpk$ +pTPK.

(TIFF)

**S1 Table. Primers used for PCR amplification in this study.**

(DOCX)

## Acknowledgments

We wish to acknowledge the Division for Medical Research Engineering, Nagoya University Graduate School of Medicine, for assistance with MiSeq experiments, CLC Genomics Workbench ver. 9, and TEM. We also thank Takuya Hattori (Department of Clinical Laboratory, Japanese Red Cross Nagoya Daiichi Hospital) for VITEK MS experiments. This manuscript was edited by Editage, a professional language-editing company.

## Author Contributions

**Conceptualization:** Hirotsugu Banno, Kouji Kimura, Yoshichika Arakawa.

**Funding acquisition:** Yoshichika Arakawa.

**Investigation:** Hirotsugu Banno, Kouji Kimura, Tsuyoshi Sekizuka, Makoto Kuroda, Wanchun Jin, Jun-ichi Wachino, Keiko Yamada.

**Project administration:** Kouji Kimura, Yoshichika Arakawa.

**Resources:** Yosuke Tanaka, Keigo Shibayama.

**Supervision:** Kouji Kimura, Yoshichika Arakawa.

**Writing – original draft:** Hirotsugu Banno, Kouji Kimura, Yoshichika Arakawa.

**Writing – review & editing:** Hirotsugu Banno, Kouji Kimura, Yosuke Tanaka, Tsuyoshi Sekizuka, Makoto Kuroda, Wanchun Jin, Jun-ichi Wachino, Keiko Yamada, Keigo Shibayama, Yoshichika Arakawa.

## References

1. Lamagni TL, Keshishian C, Efstratiou A, Guy R, Henderson KL, Broughton K, et al. Emerging trends in the epidemiology of invasive group B streptococcal disease in England and Wales, 1991–2010. *Clin Infect Dis*. 2013; 57(5):682–8. Epub 2013/07/13. <https://doi.org/10.1093/cid/cit337> PMID: 23845950.
2. Phares CR, Lynfield R, Farley MM, Mohle-Boetani J, Harrison LH, Petit S, et al. Epidemiology of invasive group B streptococcal disease in the United States, 1999–2005. *JAMA*. 2008; 299(17):2056–65. Epub 2008/05/08. <https://doi.org/10.1001/jama.299.17.2056> PMID: 18460666.
3. Okike IO, Johnson AP, Henderson KL, Blackburn RM, Muller-Pebody B, Ladhani SN, et al. Incidence, etiology, and outcome of bacterial meningitis in infants aged <90 days in the United Kingdom and Republic of Ireland: prospective, enhanced, national population-based surveillance. *Clin Infect Dis*. 2014; 59(10):e150–7. Epub 2014/07/06. <https://doi.org/10.1093/cid/ciu514> PMID: 24997051.
4. Schuchat A. Group B streptococcus. *Lancet*. 1999; 353(9146):51–6. Epub 1999/02/19. [https://doi.org/10.1016/S0140-6736\(98\)07128-1](https://doi.org/10.1016/S0140-6736(98)07128-1) PMID: 10023965.
5. Schrag S, Gorwitz R, Fultz-Butts K, Schuchat A. Prevention of perinatal group B streptococcal disease. Revised guidelines from CDC. *MMWR Recomm Rep*. 2002; 51(RR-11):1–22. Epub 2002/09/05. PMID: 12211284.
6. Dahesh S, Hensler ME, Van Sorge NM, Gertz RE Jr., Schrag S, Nizet V, et al. Point mutation in the group B streptococcal pbp2x gene conferring decreased susceptibility to beta-lactam antibiotics. *Antimicrob Agents Chemother*. 2008; 52(8):2915–8. Epub 2008/06/11. <https://doi.org/10.1128/AAC.00461-08> PMID: 18541727;
7. Kimura K, Suzuki S, Wachino J, Kurokawa H, Yamane K, Shibata N, et al. First molecular characterization of group B streptococci with reduced penicillin susceptibility. *Antimicrob Agents Chemother*. 2008; 52(8):2890–7. Epub 2008/05/21. <https://doi.org/10.1128/AAC.00185-08> PMID: 18490507;
8. Murayama SY, Seki C, Sakata H, Sunaoshi K, Nakayama E, Iwata S, et al. Capsular type and antibiotic resistance in *Streptococcus agalactiae* isolates from patients, ranging from newborns to the elderly, with invasive infections. *Antimicrob Agents Chemother*. 2009; 53(6):2650–3. Epub 2009/04/01. <https://doi.org/10.1128/AAC.01716-08> PMID: 19332682;
9. Gaudreau C, Lecours R, Ismail J, Gagnon S, Jette L, Roger M. Prosthetic hip joint infection with a *Streptococcus agalactiae* isolate not susceptible to penicillin G and ceftriaxone. *J Antimicrob Chemother*. 2010; 65(3):594–5. Epub 2009/12/22. <https://doi.org/10.1093/jac/dkp458> PMID: 20022939.
10. Nagano N, Nagano Y, Kimura K, Tamai K, Yanagisawa H, Arakawa Y. Genetic heterogeneity in pbp genes among clinically isolated group B *Streptococci* with reduced penicillin susceptibility. *Antimicrob Agents Chemother*. 2008; 52(12):4258–67. Epub 2008/09/24. <https://doi.org/10.1128/AAC.00596-08> PMID: 18809936;
11. Kimura K, Nagano N, Nagano Y, Suzuki S, Wachino J, Shibayama K, et al. High frequency of fluoroquinolone- and macrolide-resistant streptococci among clinically isolated group B streptococci with reduced penicillin susceptibility. *J Antimicrob Chemother*. 2013; 68(3):539–42. Epub 2012/11/01. <https://doi.org/10.1093/jac/dks423> PMID: 23111853.
12. Seki T, Kimura K, Reid ME, Miyazaki A, Banno H, Jin W, et al. High isolation rate of MDR group B streptococci with reduced penicillin susceptibility in Japan. *J Antimicrob Chemother*. 2015; 70(10):2725–8. Epub 2015/07/15. <https://doi.org/10.1093/jac/dkv203> PMID: 26169560.
13. Nagano N, Nagano Y, Toyama M, Kimura K, Tamura T, Shibayama K, et al. Nosocomial spread of multidrug-resistant group B streptococci with reduced penicillin susceptibility belonging to clonal complex 1. *J Antimicrob Chemother*. 2012; 67(4):849–56. Epub 2012/01/03. <https://doi.org/10.1093/jac/dkr546> PMID: 22210756.
14. Banno H, Kimura K, Tanaka Y, Kitanaka H, Jin W, Wachino J, et al. Characterization of multidrug-resistant group B streptococci with reduced penicillin susceptibility forming small non-Beta-hemolytic colonies on sheep blood agar plates. *J Clin Microbiol*. 2014; 52(6):2169–71. Epub 2014/03/14. <https://doi.org/10.1128/JCM.00226-14> PMID: 24622103;
15. Proctor RA, von Eiff C, Kahl BC, Becker K, McNamara P, Herrmann M, et al. Small colony variants: a pathogenic form of bacteria that facilitates persistent and recurrent infections. *Nat Rev Microbiol*. 2006; 4(4):295–305. Epub 2006/03/17. <https://doi.org/10.1038/nrmicro1384> PMID: 16541137.
16. Zbinden A, Quiblier C, Hernandez D, Herzog K, Bodler P, Senn MM, et al. Characterization of *Streptococcus tigurinus* small-colony variants causing prosthetic joint infection by comparative whole-genome analyses. *J Clin Microbiol*. 2014; 52(2):467–74. Epub 2014/01/31. <https://doi.org/10.1128/JCM.02801-13> PMID: 24478475;
17. Wellinghausen N, Chatterjee I, Berger A, Niederruehr A, Proctor RA, Kahl BC. Characterization of clinical *Enterococcus faecalis* small-colony variants. *J Clin Microbiol*. 2009; 47(9):2802–11. Epub 2009/07/17. <https://doi.org/10.1128/JCM.00485-09> PMID: 19605585;

18. Grobner S, Beck J, Schaller M, Autenrieth IB, Schulte B. Characterization of an *Enterococcus faecium* small-colony variant isolated from blood culture. *Int J Med Microbiol.* 2012; 302(1):40–4. Epub 2011/10/05. <https://doi.org/10.1016/j.ijmm.2011.07.001> PMID: 21968291.
19. Allegrucci M, Sauer K. Formation of *Streptococcus pneumoniae* non-phase-variable colony variants is due to increased mutation frequency present under biofilm growth conditions. *J Bacteriol.* 2008; 190(19):6330–9. Epub 2008/07/29. <https://doi.org/10.1128/JB.00707-08> PMID: 18658260;
20. Allegrucci M, Sauer K. Characterization of colony morphology variants isolated from *Streptococcus pneumoniae* biofilms. *J Bacteriol.* 2007; 189(5):2030–8. Epub 2006/12/26. <https://doi.org/10.1128/JB.01369-06> PMID: 17189375;
21. Dean MA, Olsen RJ, Long SW, Rosato AE, Musser JM. Identification of point mutations in clinical *Staphylococcus aureus* strains that produce small-colony variants auxotrophic for menadione. *Infect Immun.* 2014; 82(4):1600–5. Epub 2014/01/24. <https://doi.org/10.1128/IAI.01487-13> PMID: 24452687;
22. Besier S, Ludwig A, Ohlsen K, Brade V, Wichelhaus TA. Molecular analysis of the thymidine-auxotrophic small colony variant phenotype of *Staphylococcus aureus*. *Int J Med Microbiol.* 2007; 297(4):217–25. Epub 2007/04/07. <https://doi.org/10.1016/j.ijmm.2007.02.003> PMID: 17412637.
23. Kahl BC, Becker K, Löffler B. Clinical significance and pathogenesis of staphylococcal small colony variants in persistent infections. *Clin Microbiol Rev.* 2016; 29(2):401–27. Epub 2016/03/11. <https://doi.org/10.1128/CMR.00069-15> PMID: 26960941;
24. Kubota N, Kuzumoto K, Hidaka E, Yoshizawa K, Yumoto K, Oana K, et al. First isolation of oleate-dependent *Enterococcus faecalis* small-colony variants from the umbilical exudate of a paediatric patient with omphalitis. *J Med Microbiol.* 2013; 62(Pt 12):1883–90. Epub 2013/09/28. <https://doi.org/10.1099/jmm.0.062752-0> PMID: 24072765.
25. Sendi P, Frei R, Maurer TB, Trampuz A, Zimmerli W, Graber P. *Escherichia coli* variants in periprosthetic joint infection: diagnostic challenges with sessile bacteria and sonication. *J Clin Microbiol.* 2010; 48(5):1720–5. Epub 2010/03/26. <https://doi.org/10.1128/JCM.01562-09> PMID: 20335421;
26. Pincus SH, Cole RL, Wessels MR, Corwin MD, Kamanga-Sollo E, Hayes SF, et al. Group B streptococcal opacity variants. *J Bacteriol.* 1992; 174(11):3739–49. Epub 1992/06/11. PMID: 1592825;
27. Hanson BR, Runft DL, Streeter C, Kumar A, Carion TW, Neely MN. Functional analysis of the CpsA protein of *Streptococcus agalactiae*. *J Bacteriol.* 2012; 194(7):1668–78. Epub 2012/01/31. <https://doi.org/10.1128/JB.06373-11> PMID: 22287515;
28. Klinzing DC, Madoff LC, Puopolo KM. Genomic analysis identifies a transcription-factor binding motif regulating expression of the alpha C protein in Group B *Streptococcus*. *Microb Pathog.* 2009; 46(6):315–20. Epub 2009/03/31. <https://doi.org/10.1016/j.micpath.2009.03.003> PMID: 19328843;
29. Klinzing DC, Ishmael N, Dunning Hotopp JC, Tettelin H, Shields KR, Madoff LC, et al. The two-component response regulator LiaR regulates cell wall stress responses, pili expression and virulence in group B *Streptococcus*. *Microbiology.* 2013; 159(Pt 7):1521–34. Epub 2013/05/25. <https://doi.org/10.1099/mic.0.064444-0> PMID: 23704792;
30. Miyamoto M, Motooka D, Gotoh K, Imai T, Yoshitake K, Goto N, et al. Performance comparison of second- and third-generation sequencers using a bacterial genome with two chromosomes. *BMC Genomics.* 2014; 15:699. Epub 2014/08/22. <https://doi.org/10.1186/1471-2164-15-699> PMID: 25142801;
31. Watanabe K, Ueno M, Kamiya D, Nishiyama A, Matsumura M, Wataya T, et al. A ROCK inhibitor permits survival of dissociated human embryonic stem cells. *Nat Biotechnol.* 2007; 25(6):681–6. Epub 2007/05/29. <https://doi.org/10.1038/nbt1310> PMID: 17529971.
32. Gottschalk B, Broker G, Kuhn M, Aymanns S, Gleich-Theurer U, Spellerberg B. Transport of multidrug resistance substrates by the *Streptococcus agalactiae* hemolysin transporter. *J Bacteriol.* 2006; 188(16):5984–92. Epub 2006/08/04. <https://doi.org/10.1128/JB.00768-05> PMID: 16885467;
33. Forquin MP, Tazi A, Rosa-Fraile M, Poyart C, Trieu-Cuot P, Dramsi S. The putative glycosyltransferase-encoding gene *cylJ* and the group B *Streptococcus* (GBS)-specific gene *cylK* modulate hemolysin production and virulence of GBS. *Infect Immun.* 2007; 75(4):2063–6. Epub 2007/02/07. <https://doi.org/10.1128/IAI.01565-06> PMID: 17283108;
34. Baker LJ, Dorocke JA, Harris RA, Timm DE. The crystal structure of yeast thiamin pyrophosphokinase. *Structure.* 2001; 9(6):539–46. Epub 2001/07/04. PMID: 11435118.
35. Schweingruber AM, Dlugonski J, Edenharter E, Schweingruber ME. Thiamine in *Schizosaccharomyces pombe*: dephosphorylation, intracellular pool, biosynthesis and transport. *Curr Genet.* 1991; 19(4):249–54. Epub 1991/04/01. PMID: 1868574.
36. Fankhauser H, Zurlinden A, Schweingruber AM, Edenharter E, Schweingruber ME. *Schizosaccharomyces pombe* thiamine pyrophosphokinase is encoded by gene *tnr3* and is a regulator of thiamine metabolism, phosphate metabolism, mating, and growth. *J Biol Chem.* 1995; 270(47):28457–62. Epub 1995/11/24. PMID: 7499352.
